# Supplementary material for: Secondary organic aerosol from atmospheric photooxidation of indole
Source: Copernicus journal article supplement (doi:10.5194/acp-17-11605-2017), 2017-09-28
Supplement: Supplementary file 1 [file acp-17-11605-2017-supplement.pdf]

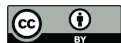

*Supplement of*

## **Secondary organic aerosol from atmospheric photooxidation of indole**

**J. Montoya-Aguilera et al.**

*Correspondence to:* Sergey A. Nizkorodov ([nizkorod@uci.edu](mailto:nizkorod@uci.edu))

The copyright of individual parts of the supplement might differ from the CC BY 3.0 License.

Contents

S1. Wall loss corrections ..... 2

S2. PTR-ToF-MS measurements of indole and volatile products of indole photooxidation ..... 3

    Figure S2.1: Estimating the OH concentration in the chamber ..... 3

    Figure S2.2: Mass spectra of the chamber VOC compounds before and after photooxidation of indole ..... 4

    Figure S2.3: Time-dependent signals of ions that were produced and then removed..... 5

    Figure S2.4: Time-dependent signals of ions that were removed during photooxidation..... 7

    Table S2. Summary of assigned PTR-ToF-MS peaks ..... 8

S3. N/C ratio in indole SOA compounds..... 9

    Figure S3: The N/C ratio of indole SOA compounds ..... 9

S4. Spatial distribution of gas-phase indole concentrations in SoCAB ..... 10

    Figure S4: The 24-hour average gas-phase indole concentrations..... 10

S5. Diurnal profile of gas-phase indole concentrations in SoCAB..... 11

    Figure S5: Gas-phase indole concentrations..... 11

S6. Diurnal profile of SOA concentrations in SoCAB ..... 12

    Figure S6: Domain wide average SOA concentrations ..... 12

## S1. Wall loss corrections

The wall loss correction was done by assuming a first-order particle size independent loss of particle mass concentration ( $PM$ )

$$\frac{dPM}{dt} = \text{Source}(t) - \text{Loss}(t) = \text{Source}(t) - k_w \times PM, \quad (\text{S1})$$

where the  $\text{Source}(t)$  and  $\text{Loss}(t)$  are time dependent production and removal rates for the particles. The effective first-order rate constant  $k_w = 0.00090 \text{ min}^{-1}$  was determined in a separate experiment in which indole SOA was produced, the lamps were turned off, and mass concentration of SOA was followed with the SMPS for 10 hours without collecting SOA on filters. Using the known  $k_w$ , we could determine  $\text{Source}(t)$  from the actual measured PM concentration in every experiment.

$$\text{Source}(t) = \frac{dPM}{dt} + k_w \times PM, \quad (\text{S2})$$

The corrected PM concentration (i.e. the hypothetical PM concentration that would be achieved if the wall loss was absent) was calculated from:

$$PM_{\text{corrected}}(t) = PM(t = 0) + \int_0^t \text{Source}(t) dt, \quad (\text{S3})$$

The integration of data was carried out numerically in Excel. Figure 3 in the main text shows a representative result of the wall loss correction.

## S2. PTR-ToF-MS measurements of indole and volatile products of indole photooxidation

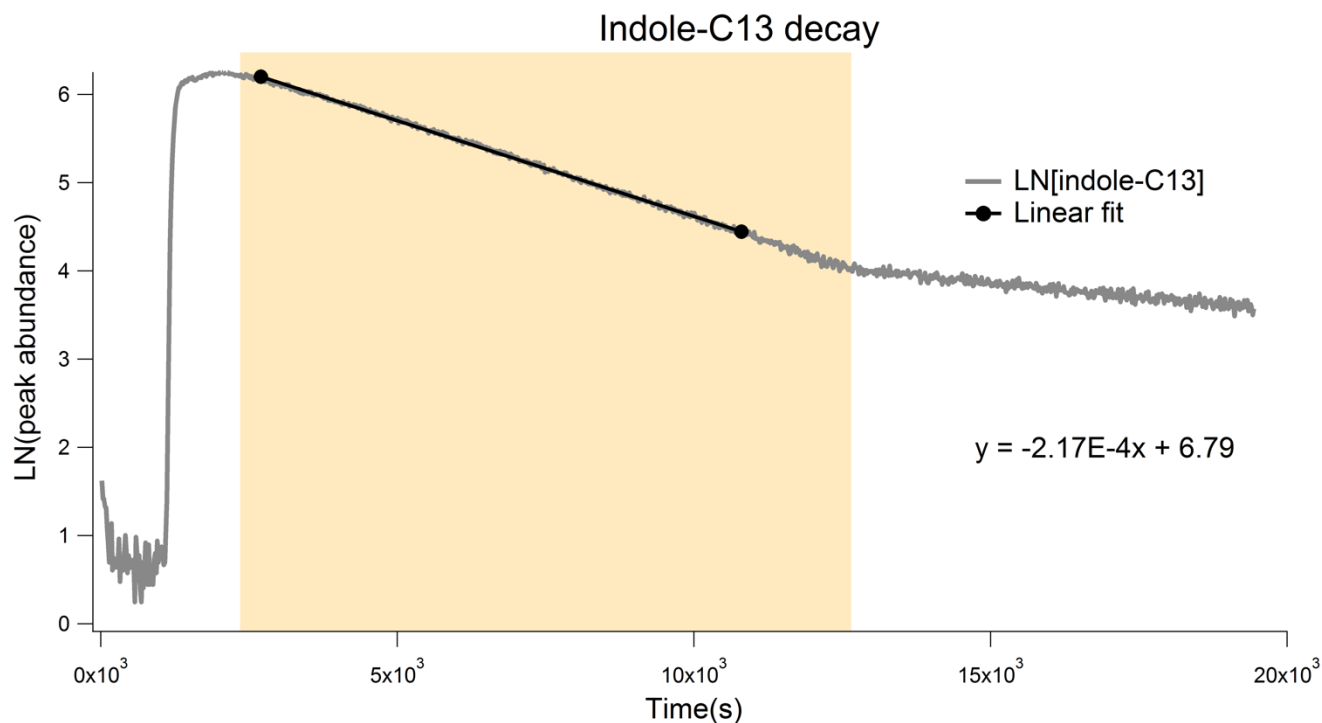

**Figure S2.1: Estimating the OH concentration in the chamber**

The OH concentration was estimated from the rate of loss of indole (measured using the <sup>13</sup>C isotopic ion of protonated indole observed at  $m/z$  119). The slope translates into  $[OH] \sim 1.4 \times 10^6$  molec cm<sup>-3</sup>. The break in the time dependence corresponds to switching off the UV lights and simultaneously starting collecting the samples. The shaded region denotes the time when the chamber lamps were on.

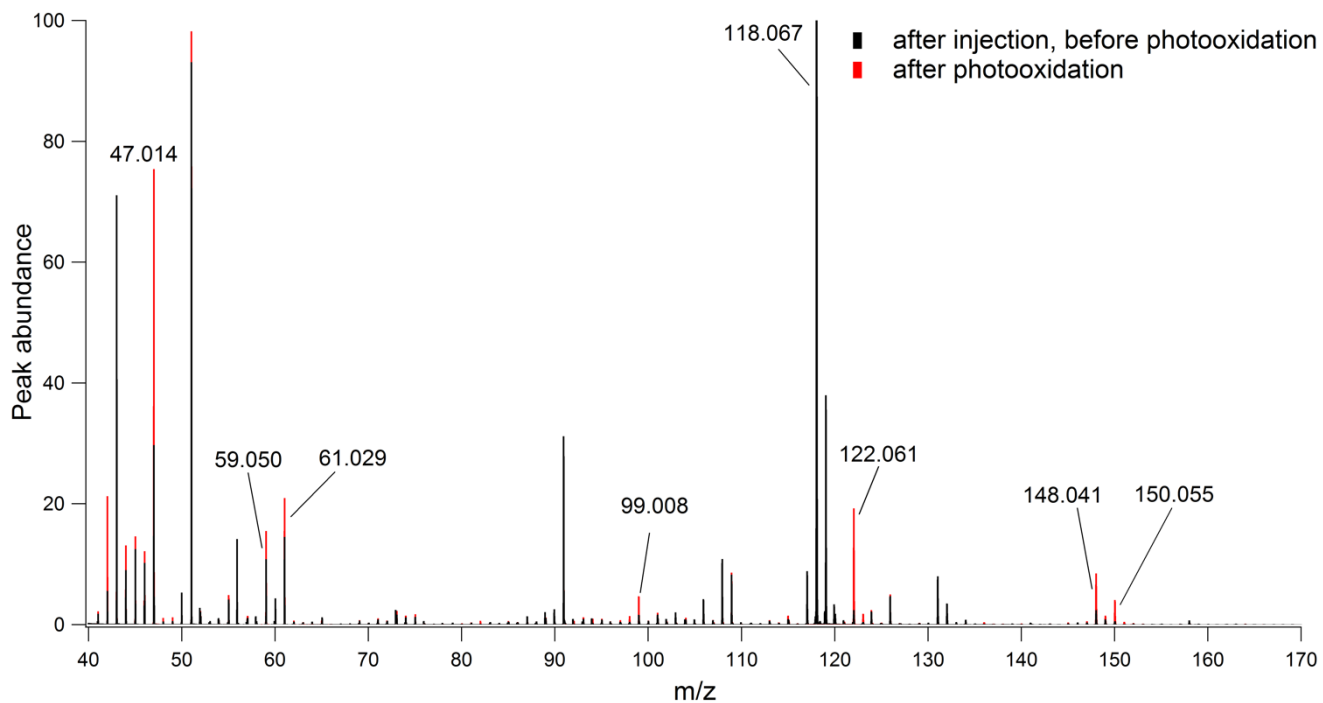

**Figure S2.2: Mass spectra of the chamber VOC compounds before and after photooxidation of indole**

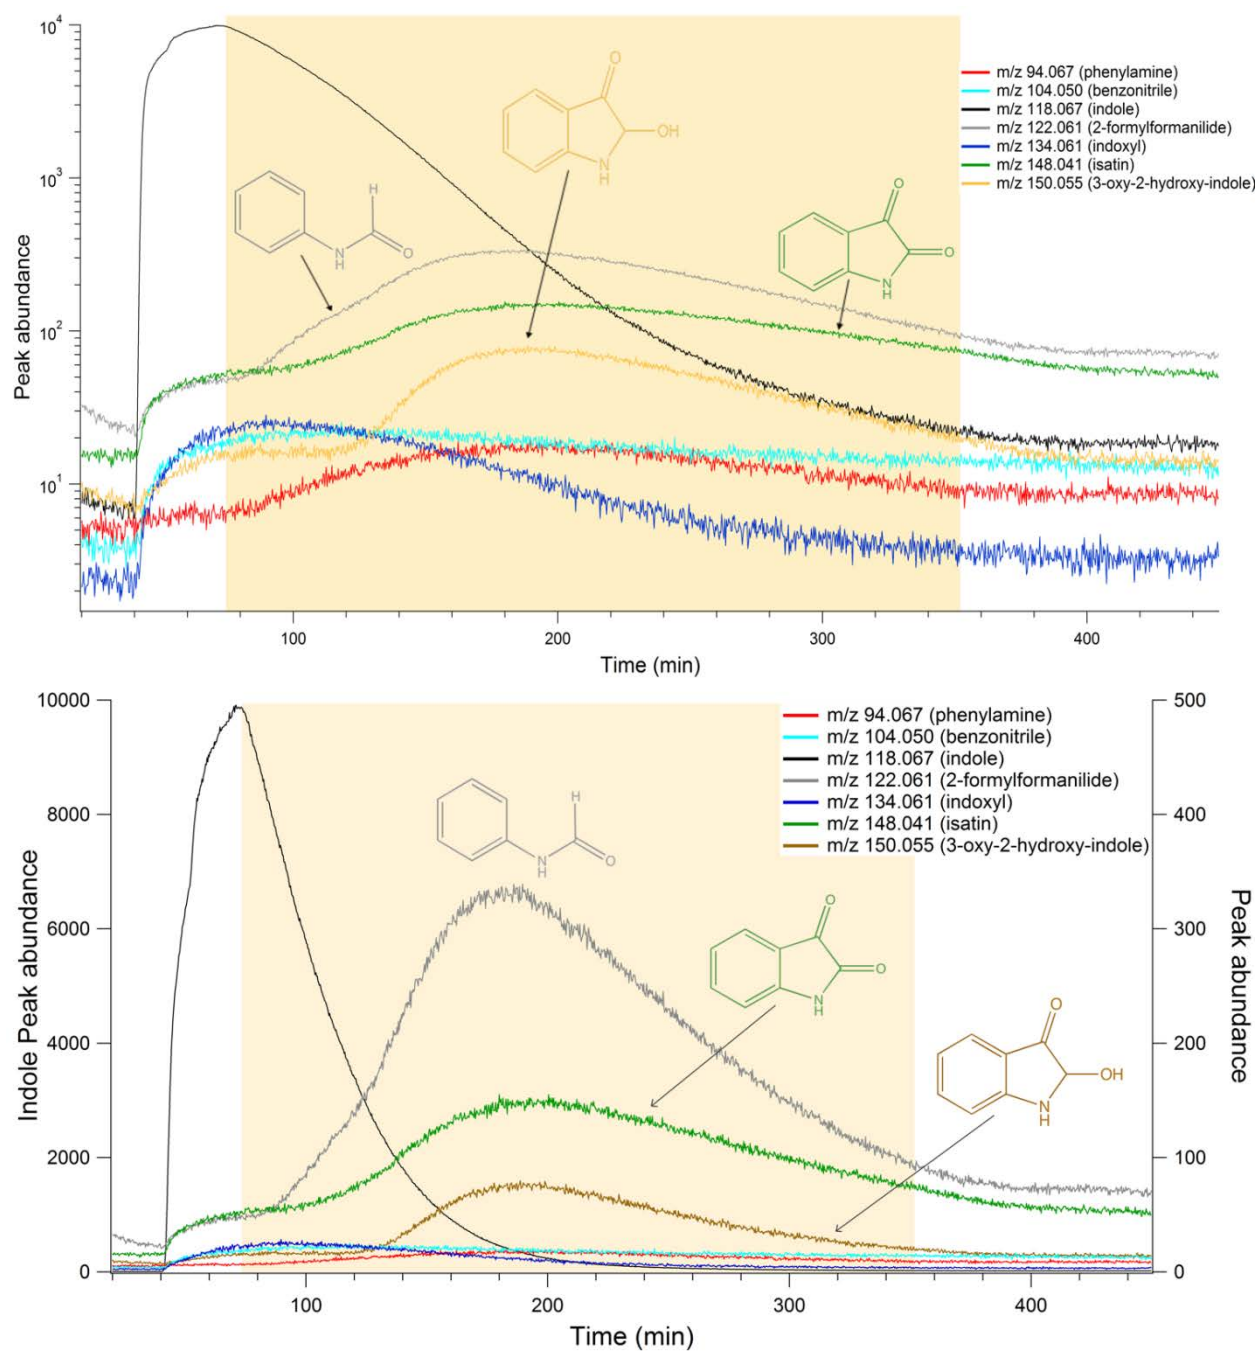

**Figure S2.3: Time-dependent signals of ions that were produced and then removed**

Shaded region denotes the time when the chamber lamps were on. The top panel shows data on the log scale and the bottom panel shows data on the linear scale. Note that segments of the sampling line for PTR-ToF-MS were not heated, and the observed time dependence may be complicated by the adsorption equilibria on the sampling

tube surfaces. For example, the unusual time dependence for  $m/z$  150.055 (3-oxy-2-hydroxy-indole, drawn in yellow) and  $m/z$  148.041 (isatin, drawn in green) was reproducible, and likely resulted from delayed passage of these compounds through the sampling lines. However, the time dependence makes it possible to sort observed compounds into ones produced by the UV radiation from the chamber lamps, and ones that are less affected (or not affected at all) by the UV radiation. This particular plot shows compounds that clearly went up when the UV lamps were on; their removal at later time is from secondary photooxidation.

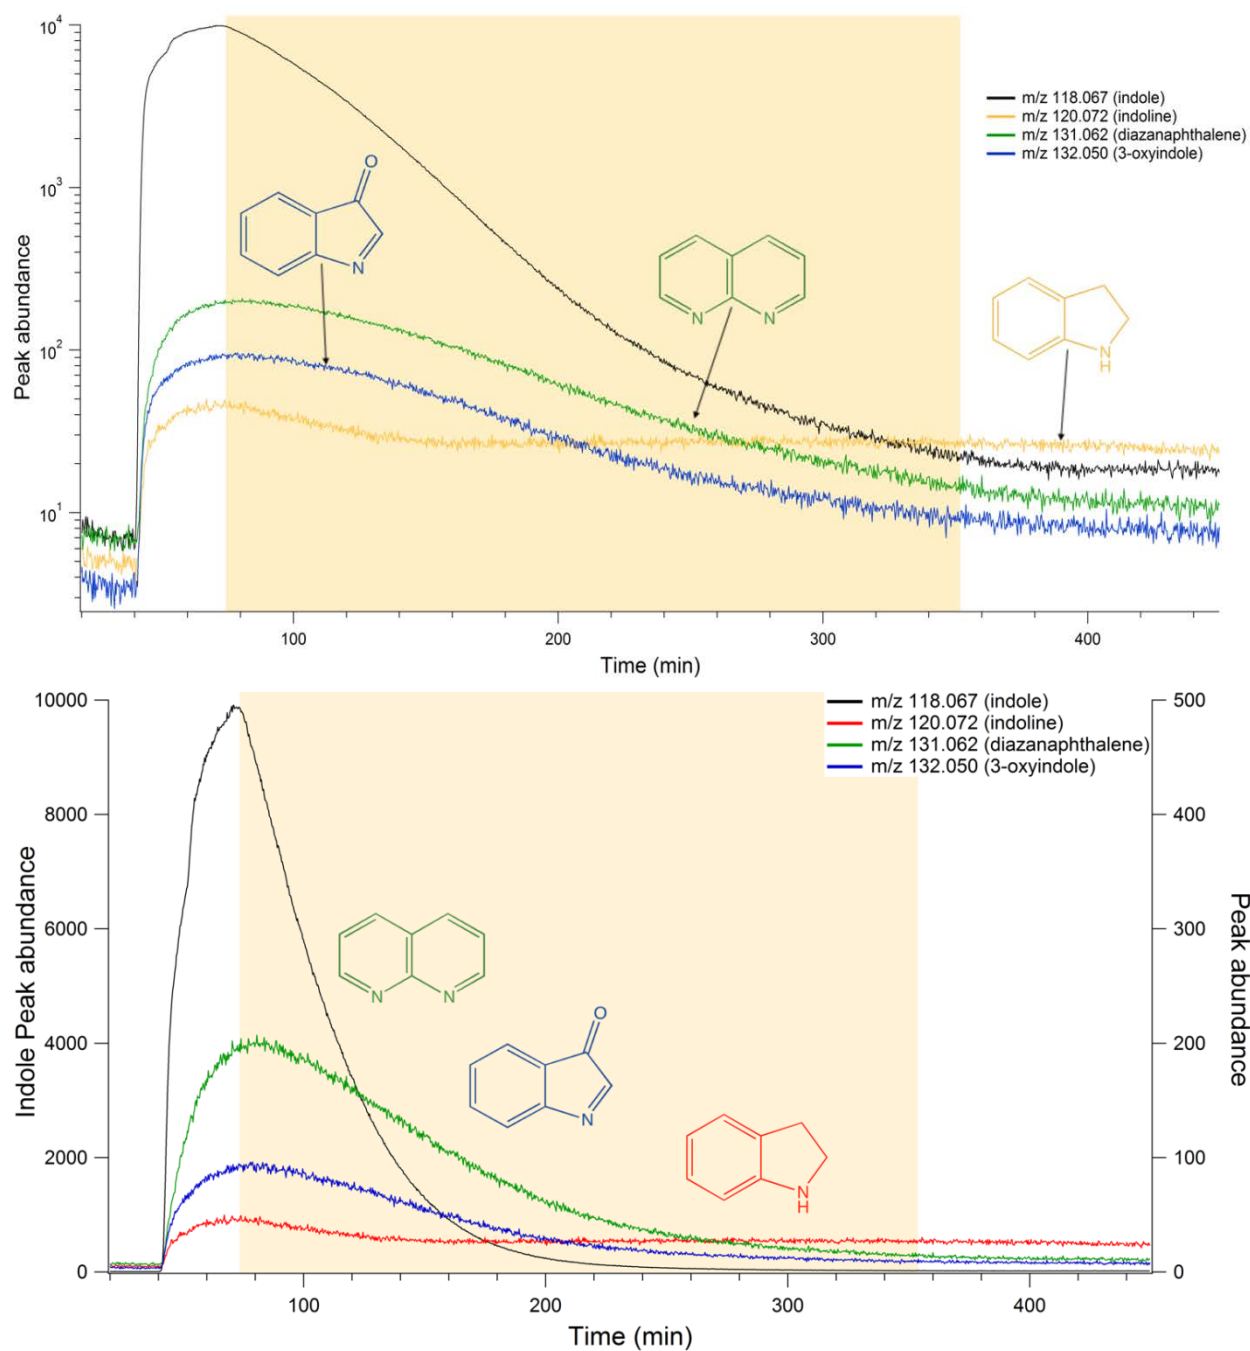

**Figure S2.4: Time-dependent signals of ions that were removed during photooxidation**

Shaded region denotes the time when the chamber lamps were on. The top panel shows data on the log scale and the bottom panel shows data on the linear scale. Indoline and diazanaphthalene were likely present in the indole sample to begin with, as impurities.



**Table S2. Summary of assigned PTR-ToF-MS peaks**

| Calibrated<br>m/z | Exact<br>m/z | Ion Formula                         | Neutral<br>Formula                  | Possible Assignment         | Behavior              |
|-------------------|--------------|-------------------------------------|-------------------------------------|-----------------------------|-----------------------|
| 44.014            | 44.0131      | $\text{CH}_2\text{NO}^+$            | HOCN                                | cyanic acid                 | produced              |
| 45.034            | 45.0335      | $\text{C}_2\text{H}_5\text{O}^+$    | $\text{C}_2\text{H}_4\text{O}$      | acetaldehyde                | produced              |
| 46.029            | 46.0287      | $\text{CH}_4\text{NO}^+$            | $\text{CH}_3\text{NO}$              | nitrosomethane              | produced              |
| 47.014            | 47.0128      | $\text{CH}_3\text{O}_2^+$           | HCOOH                               | formic acid                 | produced              |
| 59.050            | 59.0491      | $\text{C}_3\text{H}_7\text{O}^+$    | $\text{C}_3\text{H}_6\text{O}$      | acetone                     | produced              |
| 61.029            | 61.0284      | $\text{C}_2\text{H}_5\text{O}_2^+$  | $\text{C}_2\text{H}_4\text{O}_2$    | acetic acid                 | produced              |
| 90.950            | 90.9477      | $\text{FeO}_2\text{H}_3^+$          | $\text{H}_2\text{O}\cdot\text{FeO}$ | produced in ion source      |                       |
| 94.067            | 94.0651      | $\text{C}_6\text{H}_8\text{N}^+$    | $\text{C}_6\text{H}_7\text{N}$      | phenylamine (aniline)       | produced then removed |
| 98.026            | 98.0237      | $\text{C}_4\text{H}_4\text{NO}_2^+$ | $\text{C}_4\text{H}_3\text{NO}_2$   | maleimide                   | produced              |
| 99.008            | 99.0077      | $\text{C}_4\text{H}_3\text{O}_3^+$  | $\text{C}_4\text{H}_2\text{O}_3$    | maleic anhydride            | produced              |
| 104.050           | 104.0495     | $\text{C}_7\text{H}_6\text{N}^+$    | $\text{C}_6\text{H}_5\text{CN}$     | benzonitrile                | produced then removed |
| 118.067           | 118.0651     | $\text{C}_8\text{H}_8\text{N}^+$    | $\text{C}_8\text{H}_7\text{N}$      | indole                      | removed               |
| 120.072           | 120.0808     | $\text{C}_8\text{H}_{10}\text{N}^+$ | $\text{C}_8\text{H}_9\text{N}$      | indoline (impurity)         | removed               |
| 122.061           | 122.0600     | $\text{C}_7\text{H}_8\text{NO}^+$   | $\text{C}_7\text{H}_7\text{NO}$     | 2-formylformanilide         | produced then removed |
| 131.062           | 131.0604     | $\text{C}_8\text{H}_7\text{N}_2^+$  | $\text{C}_8\text{N}_6\text{N}_2$    | diazanaphthalene (impurity) | removed               |
| 132.050           | 132.0444     | $\text{C}_8\text{H}_6\text{NO}^+$   | $\text{C}_8\text{H}_5\text{NO}$     | 3-oxyindole                 | removed               |
| 134.061           | 134.0600     | $\text{C}_8\text{H}_8\text{NO}^+$   | $\text{C}_8\text{H}_7\text{NO}$     | indoxyl, 3-oxindole         | produced then removed |
| 148.041           | 148.0393     | $\text{C}_8\text{H}_6\text{NO}_2^+$ | $\text{C}_8\text{H}_5\text{NO}_2$   | isatin                      | produced then removed |
| 150.055           | 150.0550     | $\text{C}_8\text{H}_8\text{NO}_2^+$ | $\text{C}_8\text{H}_7\text{NO}_2$   | 3-oxy-2-hydroxy-indole      | produced then removed |

### S3. N/C ratio in indole SOA compounds

Reactions that involve oxidation and oligomerization of indole without loss of C or N atoms should conserve the N/C ratio at the value of  $1/8$  ( $= 0.125$ ), the initial value in indole. Loss and gain of N atoms should result in a large decrease and increase in the N/C ratio, respectively. Loss and gain of C atoms should result in a small increase and decrease in the N/C ratio, respectively. All of these processes are clearly happening in the photooxidation of indole although the N/C conserving processes are clearly dominant.

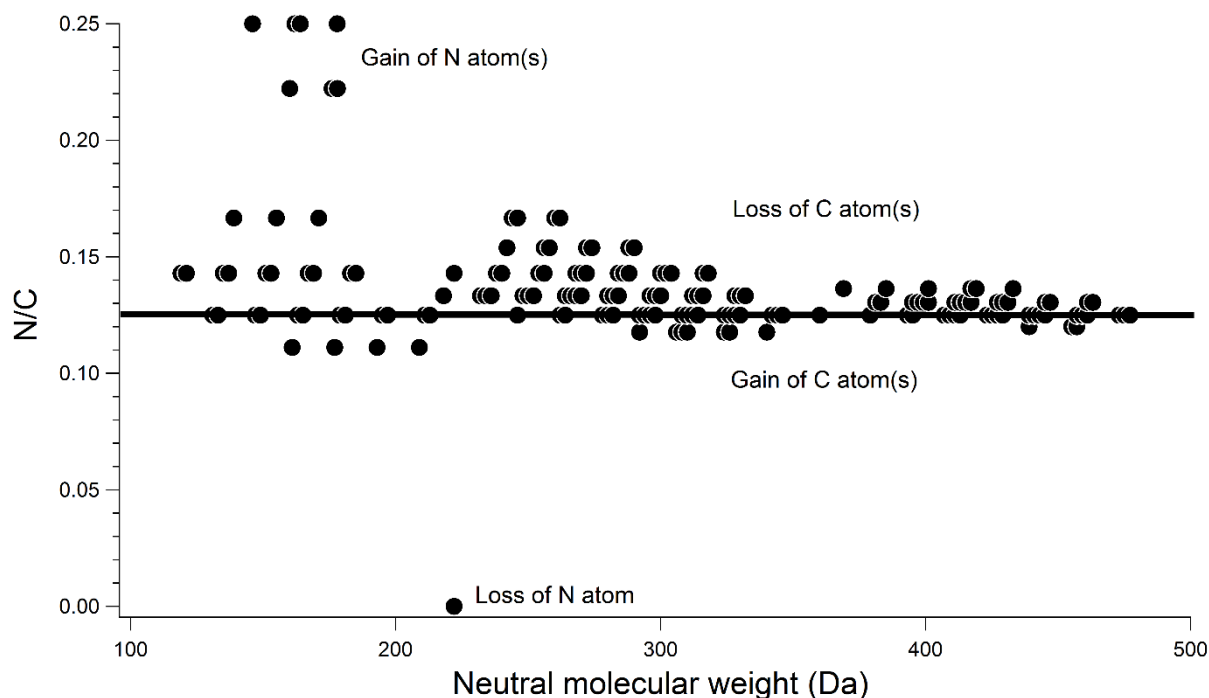

**Figure S3: The N/C ratio of indole SOA compounds**

The thick horizontal line corresponds to the N/C ratio in indole.

**S4. Spatial distribution of gas-phase indole concentrations in SoCAB**

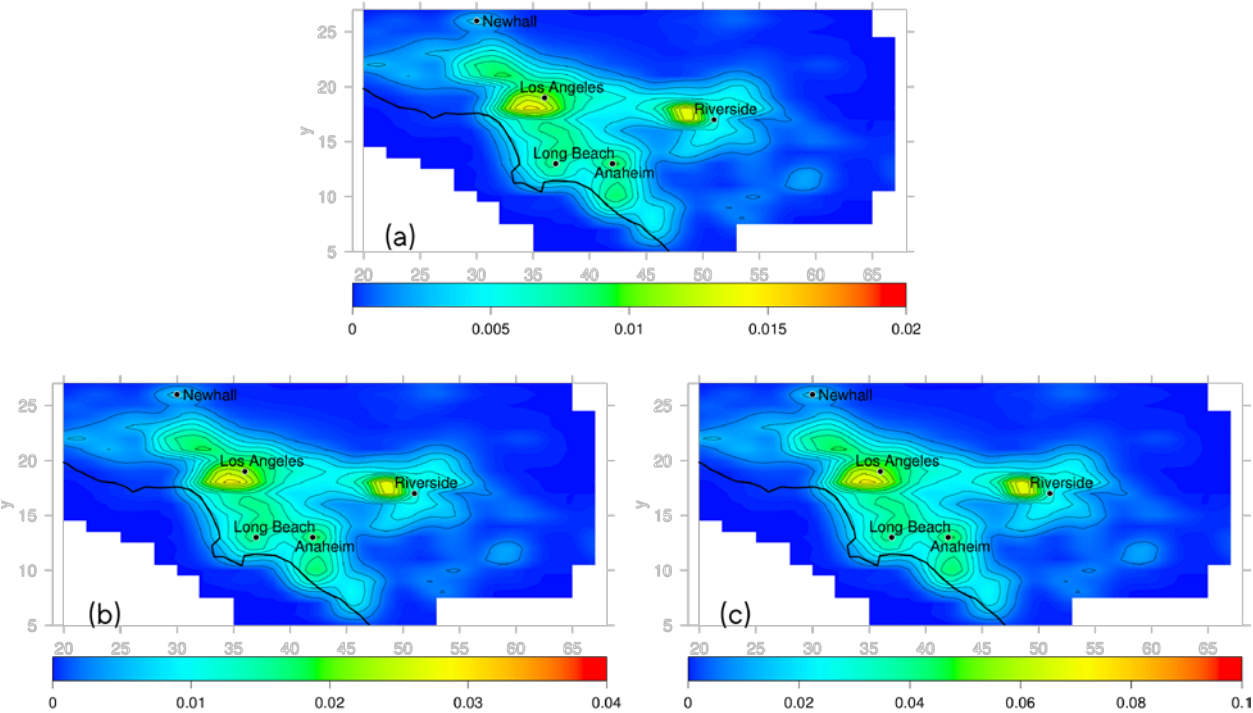

**Figure S4: The 24-hour average gas-phase indole concentrations**

The indole mixing ratios in ppbv are shown in the low emission scenario (a), medium emissions scenario (b), and high emission scenario (c).

## S5. Diurnal profile of gas-phase indole concentrations in SoCAB

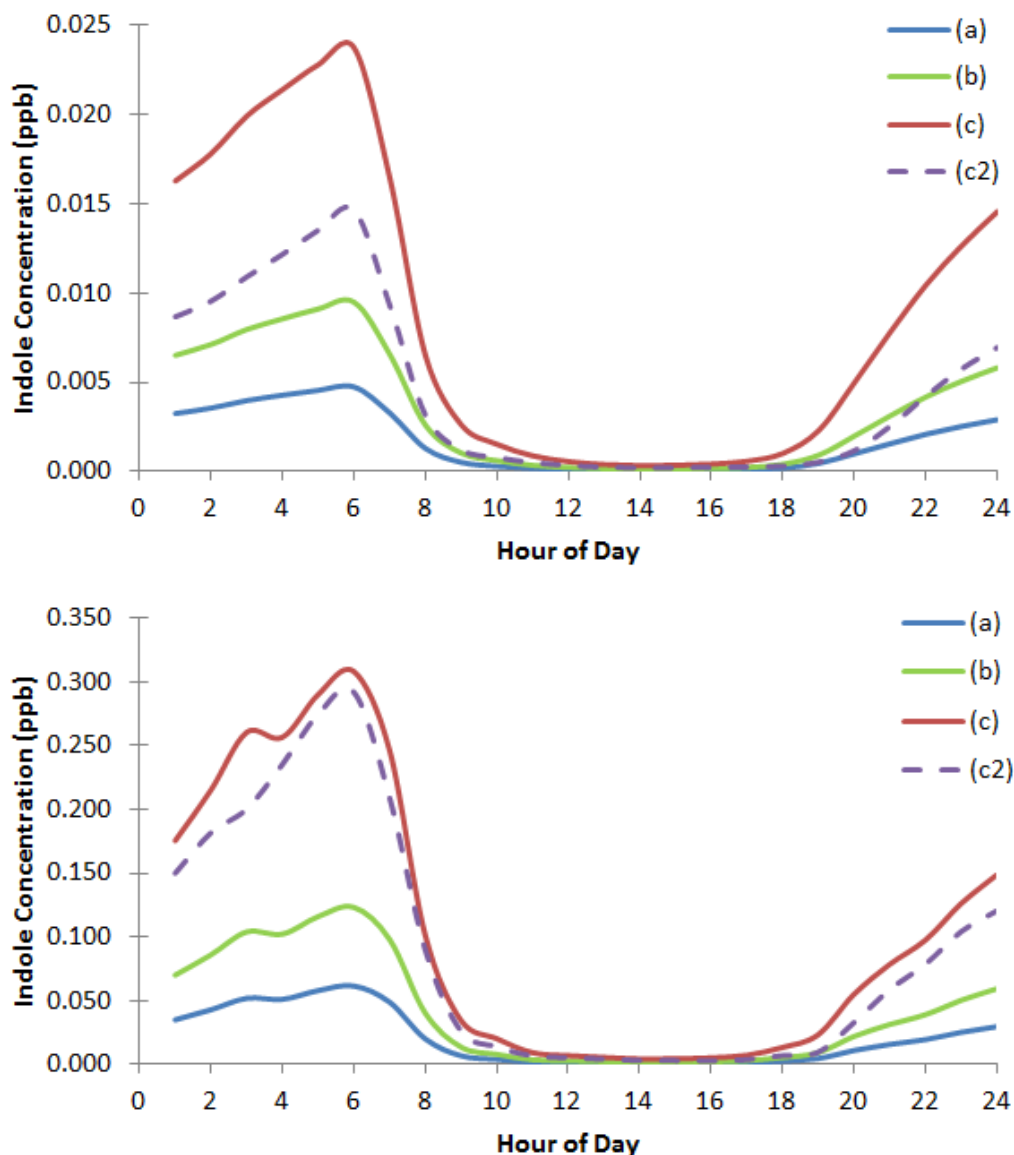

**Figure S5: Gas-phase indole concentrations**

The indole mixing ratios in ppbv are shown for the low emissions scenario (a), medium emissions scenario (b), and high emissions scenario (c). In addition, trace (c2) shows mixing ratios in the high emissions scenario with indole oxidation via reaction with NO<sub>3</sub> included in the model. Domain wide average concentrations are shown in the top panel and domain maximum concentrations are shown in the bottom panel.

## S6. Diurnal profile of SOA concentrations in SoCAB

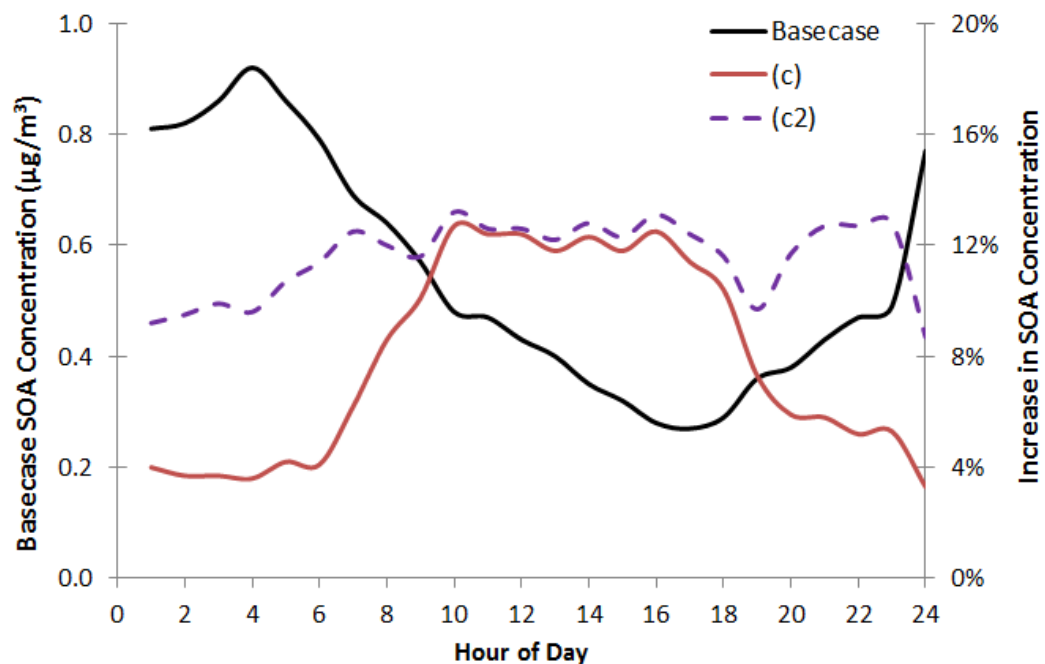

**Figure S6: Domain wide average SOA concentrations**

The base case mass concentration of SOA is shown in black line referenced to the left axis. Also shown is the percent increase in the domain wide average SOA concentrations (right axis) due to indole SOA in the high emissions scenario (c), and high emissions scenario with indole oxidation via reaction with  $\text{NO}_3$  included in the model (c2). The daytime concentrations are not significantly affected by  $\text{NO}_3$  but the nighttime concentrations increase.
